# Supplementary material for: Retracted Article: Sublimable cationic Ir(iii) phosphor using chlorine as a counterion for high-performance monochromatic and white OLEDs
Source: Royal Society of Chemistry journal article supplement (doi:10.1039/c8cc06201c), 2018-01-01
Supplement: c8cc06201c1.pdf [file c8cc06201c1.pdf]

## Electronic Supplementary Information (ESI)

### **Sublimable cationic Ir(III) phosphor using chlorine as counterion for high-performance monochromatic and white OLEDs**

Lei Ding,<sup>a</sup> Chun-Xiu Zang,<sup>b</sup> Hui-Ting Mao,<sup>a</sup> Guo-Gang Shan,<sup>\*a</sup> Li-Li Wen,<sup>a</sup> Hai-Zhu Sun,<sup>\*a</sup> Wen-Fa Xie,<sup>\*b</sup> and Zhong-Min Su<sup>\*ac</sup>

*<sup>a</sup>Institute of Functional Material Chemistry and National & Local United Engineering Lab for Power Battery, Faculty of Chemistry, Northeast Normal University, Changchun 130024, P. R. China*

Fax: +86-431-85684009 Tel.: +86-431-85099108

E-mail: [shangg187@nenu.edu.cn](mailto:shangg187@nenu.edu.cn) (G. Shan); [sunhz335@nenu.edu.cn](mailto:sunhz335@nenu.edu.cn) (H. Sun); [zmsu@nenu.edu.cn](mailto:zmsu@nenu.edu.cn) (Z. Su)

*<sup>b</sup>State Key Laboratory on Integrated Optoelectronics, College of Electronic Science and Engineering, Jilin University, Changchun, Jilin 130012, P. R. China*

Tel: +86-13844907598, E-mail: [xiewf@jlu.edu.cn](mailto:xiewf@jlu.edu.cn) (W. Xie)

*<sup>c</sup>School of Chemistry & Environmental Engineering, Changchun University of Science and Technology, Changchun, Jilin 130012, P. R. China*

## Table of Contents

|                                                                                                                                  |     |
|----------------------------------------------------------------------------------------------------------------------------------|-----|
| 1. Experimental section                                                                                                          | S3  |
| 2. TGA curves of [(ptbi) <sub>2</sub> Ir(bisq)]Cl                                                                                | S7  |
| 3. DSC curves of [(ptbi) <sub>2</sub> Ir(bisq)]Cl                                                                                | S7  |
| 4. <sup>1</sup> H NMR spectra of [(ptbi) <sub>2</sub> Ir(bisq)]Cl in the pristine state and after sublimation.                   | S8  |
| 5. PL spectra of [(ptbi) <sub>2</sub> Ir(bisq)]Cl in spin-coated and vacuum-evaporated neat film.                                | S8  |
| 6. PL spectra of [(ptbi) <sub>2</sub> Ir(bisq)]Cl in 77 K.                                                                       | S9  |
| 7. Photophysical and electrochemical characteristics for [(ptbi) <sub>2</sub> Ir(bisq)]Cl                                        | S9  |
| 8. Calculated HOMO and LUMO levels and distributions of [(ptbi) <sub>2</sub> Ir(bisq)]Cl.                                        | S10 |
| 9. Calculated triplet excited energy, and transition characteristic of T <sub>1</sub> state for [(ptbi) <sub>2</sub> Ir(bisq)]Cl | S10 |
| 10. AFM images of non-doped evaporated film and doped evaporated film                                                            | S10 |
| 11. EL spectra of OLED and PL spectra of doped evaporated film                                                                   | S11 |
| 12. Monochromatic OLEDs performance of selected cationic iridium(III) complexes                                                  | S11 |
| 13. Schematic diagram of white OLEDs optimization process                                                                        | S12 |
| 14. EL performances for W1-W3                                                                                                    | S13 |
| 15. WOLEDs performance of selected cationic iridium(III) complexes                                                               | S13 |
| 16. Chemical structure of [(tbpbi) <sub>2</sub> Ir(bisq)]Cl                                                                      | S14 |
| 17. TGA curves of [(tbpbi) <sub>2</sub> Ir(bisq)]Cl                                                                              | S14 |
| 18. <sup>1</sup> H NMR spectra of [(tbpbi) <sub>2</sub> Ir(bisq)]Cl in the pristine state and after sublimation.                 | S15 |
| 19. <sup>1</sup> H NMR spectra of [(tbpbi) <sub>2</sub> Ir(bisq)]PF <sub>6</sub> in the pristine state and after sublimation.    | S15 |
| 20. References                                                                                                                   | S16 |

## Experimental section

### 1. General information

All reagents and solvents were commercially available. Elemental analysis (C, H, and N) was determined on a Perkin-Elmer 240C elemental analyzer.  $[(\text{ptbi})_2\text{Ir}(\text{bisq})]\text{Cl}$ ,  $[(\text{tbpbi})_2\text{Ir}(\text{bisq})]\text{Cl}$  and  $[(\text{tbpbi})_2\text{Ir}(\text{bisq})]\text{PF}_6$  were recorded by a  $^1\text{H}$  NMR spectrum on Bruker Avance 600 MHz spectrometer, and chemical shifts are reported with tetramethylsilane (TMS) as the internal standard. The molecular weight of  $[(\text{ptbi})_2\text{Ir}(\text{bisq})]\text{Cl}$  was measured by using electrospray-ionization mass spectroscopy (ESI-MS).

### 2. Synthesis

The ancillary ligand 1-(1*H*-benzo[d]imidazol-2-yl)isoquinoline (Hbisq) was synthesized according to the previously reported literature with some modification.<sup>1</sup>

#### 2.1. Synthesis of 1-phenyl-2-*p*-tolyl-1*H*-benzo[d]imidazole (ptbi)

50 mmol (9.21 g) of *N*-phenyl-*o*-phenylenediamine was dissolved in 30 mL of *N,N*-dimethylacetamide. Under nitrogen, 20 mL *N,N*-dimethylacetamide solution of 4-methylbenzoyl chloride (50 mmol, 7.73 g) was slowly added dropwise to above solution and stirred at room temperature for 1 h. After the reaction, a large amount of water was added to precipitate a solid. The solid was washed with methanol and water, then recrystallized with a mixed solution of *N,N*-dimethylacetamide and water. The resulting intermediate was added to 20 mL of glacial acetic acid and heated to reflux for 16 h, and then cooled to room temperature. Water was added to precipitate a solid and dried to give the product. Then, product was purified by column chromatography on silica gel.  $^1\text{H}$  NMR (500 MHz,  $\text{CDCl}_3$ ,  $\delta$ ): 7.89 (d,  $J = 8.0$  Hz, 1H), 7.52-7.45 (m, 5H), 7.35-7.31 (m, 3H), 7.27-7.23 (m, 2H), 7.11 (d,  $J = 8.0$  Hz, 2H), 2.34 (s, 3H).

#### 2.2. Synthesis of dichloro-bridged diiridium complex

$[\text{Ir}(\text{ptbi})_2\text{Cl}]_2$  :  $\text{IrCl}_3 \cdot 3\text{H}_2\text{O}$  (1.06 g, 3.00 mmol), ptbi (2.05 g, 7.20 mmol), 2-ethoxyethanol (60 mL) and water (20 mL) were mixed together and refluxed under argon for 24 hours. The reaction mixture was then cooled to room temperature and filtered. The product was washed with water and dried.

#### 2.3. Synthesis of complex $[(\text{ptbi})_2\text{Ir}(\text{bisq})]\text{Cl}$

The ancillary ligand Hbisq (0.15 g, 0.60 mmol) and the dichloro-bridged diiridium complex  $[\text{Ir}(\text{ptbi})_2\text{Cl}]_2$  (0.38 g, 0.24 mmol) are dissolved in dichloro-methane (30 mL) and ethanol (10 mL). Then the mixture was refluxed for 24 hours under the protection of light and argon. After cooling to room temperature, the mixture was distilled off the solvent and then the crude product was purified through silica gel column chromatography using an ethyl acetate-dichloromethane mixture (10 : 1) and then a dichloromethane-methanol mixture (25 : 1) as eluent to afford complex  $[(\text{ptbi})_2\text{Ir}(\text{bisq})]\text{Cl}$  in 68% yield.  $^1\text{H}$  NMR (600 MHz,  $\text{DMSO-}d_6$ ,  $\delta$ ): 10.79 (s, 1H), 8.05-8.07 (m, 2H), 7.71-7.93 (m, 12H), 7.58 (t,  $J=3.6$  Hz, 2H), 7.45 (d,  $J=6.0$  Hz, 1H), 6.95-7.10 (m, 5H), 6.81 (t,  $J=7.8$  Hz, 1H), 6.73 (s, 1H), 6.69 (t,  $J=7.5$  Hz, 1H), 6.49-6.58 (m, 4H), 6.37 (d,  $J=13.2$  Hz, 2H), 6.26 (d,  $J=8.4$  Hz, 1H), 5.83 (d,  $J=8.4$  Hz, 1H), 5.64 (d,  $J=4.8$  Hz, 1H), 2.03 (d,  $J=9.0$  Hz, 6H). MS (MALDI-TOF):  $m/z$  1004.3.

#### 2.4. Synthesis of complex $[(\text{tbpb})_2\text{Ir}(\text{bisq})]\text{Cl}$

The synthetic method of  $[(\text{tbpb})_2\text{Ir}(\text{bisq})]\text{Cl}$  is similar to that of  $[(\text{ptbi})_2\text{Ir}(\text{bisq})]\text{Cl}$ , in which the dichloro-bridged diiridium complex  $[\text{Ir}(\text{ptbi})_2\text{Cl}]_2$  is replaced by  $[\text{Ir}(\text{tbpb})_2\text{Cl}]_2$ .

$[(\text{tbpb})_2\text{Ir}(\text{bisq})]\text{Cl}$  in 67% yield.  $^1\text{H}$  NMR (600 MHz,  $\text{DMSO-}d_6$ ,  $\delta$ ): 10.86 (s, 1H), 8.05 (d,  $J=7.2$  Hz, 1H), 7.98 (d,  $J=6.0$  Hz, 1H), 7.92-7.94 (m, 2H), 7.70-7.85 (m, 11H), 7.27-7.32 (m, 2H), 7.14-7.15 (m, 1H), 7.06-7.09 (m, 2H), 6.99 (d,  $J=8.4$  Hz, 2H), 6.91 (t,  $J=7.8$  Hz, 1H), 6.79-6.81 (m, 1H), 6.75-6.76 (m, 1H), 6.72 (t,  $J=7.8$  Hz, 1H), 6.58-6.60 (m, 2H), 6.47-6.52 (m, 3H), 5.97-6.00 (m, 2H), 5.75-5.76 (m, 1H), 0.89 (d,  $J=7.2$  Hz, 18H)

#### 2.5. Synthesis of complex $[(\text{tbpb})_2\text{Ir}(\text{bisq})]\text{PF}_6$

The ancillary ligand Hbisq (0.15 g, 0.60 mmol) and the dichloro-bridged diiridium complex  $[\text{Ir}(\text{tbpb})_2\text{Cl}]_2$  (0.42 g, 0.24 mmol) are dissolved in dichloro-methane (30 mL) and ethanol (10 mL). Then the mixture was refluxed for 24 hours under the protection of light and argon. After cooling to room temperature, an aqueous solution of  $\text{KPF}_6$  was slowly added into the reaction mixture under stirring. The crude product was purified by column chromatography on silica gel with dichloromethane- methanol (v/v = 10:1) as the eluent.

**[(tbpbi)<sub>2</sub>Ir(bisq)]PF<sub>6</sub>** in 65% yield. <sup>1</sup>H NMR (600 MHz, DMSO-*d*<sub>6</sub>, δ): 15.11 (s, 1H), 8.22 (s, 1H), 8.08 (t, *J*=7.8 Hz, 4H), 7.86 (d, *J*=7.2 Hz, 1H), 7.75-7.82 (m, 8H), 7.70 (d, *J*=7.8 Hz, 1H), 7.32-7.33 (m, 2H), 7.27-7.28 (m, 1H), 7.18 (t, *J*=7.8 Hz, 1H), 7.14 (t, *J*=7.8 Hz, 1H), 7.09 (d, *J*=7.8 Hz, 1H), 7.05 (d, *J*=8.4 Hz, 1H), 6.93 (t, *J*=7.8 Hz, 2H), 6.81-6.88 (m, 3H), 6.55 (d, *J*=1.8 Hz, 1H), 6.50 (t, *J*=8.7 Hz, 2H), 6.44 (s, 1H), 6.13 (d, *J*=7.8 Hz, 1H), 5.90 (t, *J*=9.9 Hz, 2H), 0.88 (s, 18H)

### 3. Physical measurements

The UV-vis absorption spectrum was measured on a Cary 500 UV-vis-NIR spectrophotometer. Emission spectra of **[(ptbi)<sub>2</sub>Ir(bisq)]Cl** was recorded on the FL-4600 FL spectrophotometer at room temperature. The neat film was prepared through spin-coating a solution of **[(ptbi)<sub>2</sub>Ir(bisq)]Cl** in CH<sub>3</sub>CN (20 mg mL<sup>-1</sup>) on precleaned glass substrates at 2000 rpm. Then, PLQY ( $\Phi_p$ ) in a neat film was performed on an integrating sphere in a fluorospectrophotometer. The excited-state lifetime and PLQY in solution were measured on a transient spectrofluorimeter (EdinburghFLSP920) using a time-correlated single-photon counting technique. The thermogravimetric analysis was performed on a Perkin-Elmer TG-7 analyzer heated from 30 to 800 °C in a nitrogen atmosphere at a scanning rate of 10 °C min<sup>-1</sup>. The differential scanning calorimetry analysis was measured on a NETZSCH DSC-204 analyzer heated from 30 to 400 °C in a nitrogen atmosphere at a scanning rate of 10 °C min<sup>-1</sup>.

### 4. Theoretical Calculation.

Theoretical Calculation on **[(ptbi)<sub>2</sub>Ir(bisq)]Cl** was performed by Gaussian 09 software package.<sup>2</sup> The structure of iridium(III) complex was fully optimized with PBE0 for ground states (*S*<sub>0</sub>) geometry and spin-unrestricted open-shell PBE0 for the lowest triplet state (*T*<sub>1</sub>) geometry, respectively. The standard 6-31G\*\* basis set was used C, H and N atoms, and the LANL2DZ on the iridium(III) atom was employed in all calculations. To assist in understanding the excited-state electronic properties of **[(ptbi)<sub>2</sub>Ir(bisq)]Cl**, the time-dependent density functional theory (TDDFT) calculation was employed considering the implicit acetonitrile solvent effect.

### 5. Cyclic voltammetry

Cyclic voltammetry was recorded on a BAS 100 W instrument with a scan rate of 100 mV s<sup>-1</sup> in CH<sub>3</sub>CN (10<sup>-3</sup> M) with three-electrode configuration: a glassy carbon electrode as the working electrode, an aqueous saturated calomel electrode as the operating reference electrode and a platinum wire as the counter electrode. A 0.1 M solution of tetra-butylammonium tetrafluoroborate in CH<sub>3</sub>CN was used as the supporting electrolyte and ferrocene was selected as the internal standard.

## 6. Device fabrication and characterization

Patterned indium-tin-oxide (ITO)-coated glass substrates with the sheet resistance of 20 Ω per square were cleaned with rinsing in Decon 90, deionized water, drying in an oven, and finally were treated in a UV-ozone chamber. Organic layers and cathode were sequentially deposited on the ITO-glass substrates without breaking the vacuum (~5.0×10<sup>-4</sup> Pa). [(ptbi)<sub>2</sub>Ir(bisq)]Cl was sequentially deposited on the ITO-glass substrates without breaking the vacuum (~5.0×10<sup>-4</sup> Pa) and keeping 220 °C. A shadow mask was used to define the cathode and to make four 10 mm<sup>2</sup> devices on each substrate. The thickness of the organic layers and metal were monitored in situ with quartz oscillator. Luminance–current–voltage characteristics of the unpackaged devices were measured simultaneously with a programmable Keithley 2400 source meter and a Minolta luminance meter LS-110. The spectra of the devices were measured with an Ocean Optics Maya 2000-PRO spectrometer. All the measurements were carried out at room temperature in air.

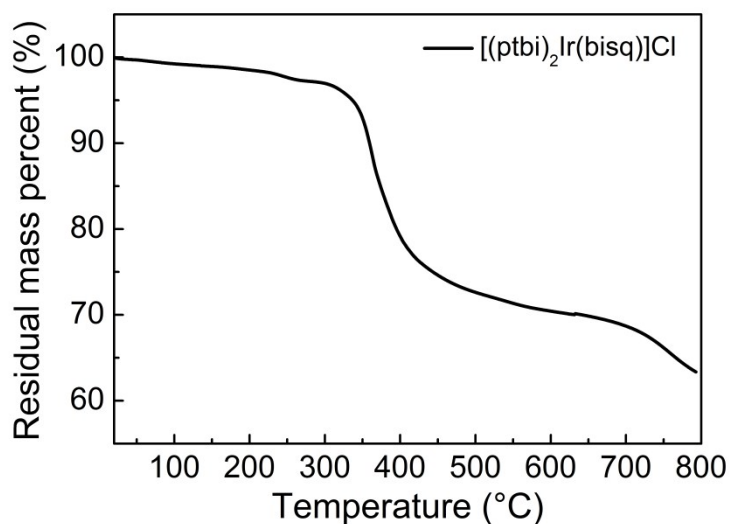

**Fig. S1** Thermal gravimetric analysis (TGA) curves of  $[(\text{ptbi})_2\text{Ir}(\text{bisq})]\text{Cl}$  under a dry nitrogen gas flow at a heating rate of  $10^\circ\text{C min}^{-1}$ .

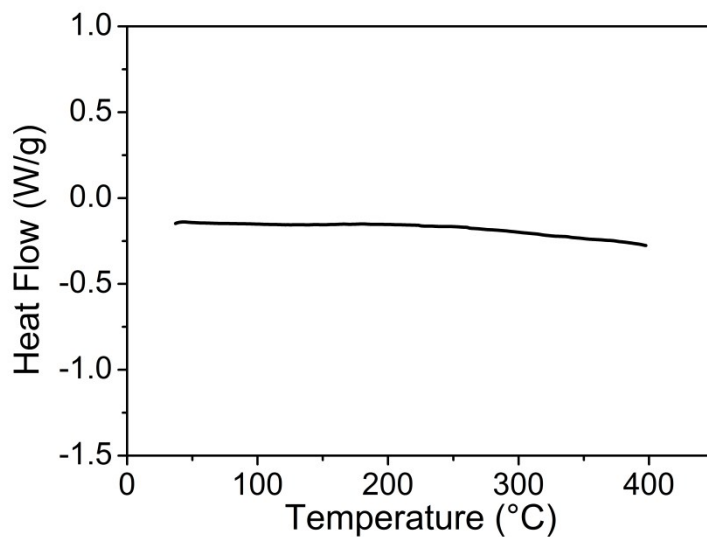

**Fig. S2** The second cycle differential scanning calorimetry (DSC) curves of  $[(\text{ptbi})_2\text{Ir}(\text{bisq})]\text{Cl}$  under a dry nitrogen gas flow at a heating rate of  $10^\circ\text{C min}^{-1}$ .

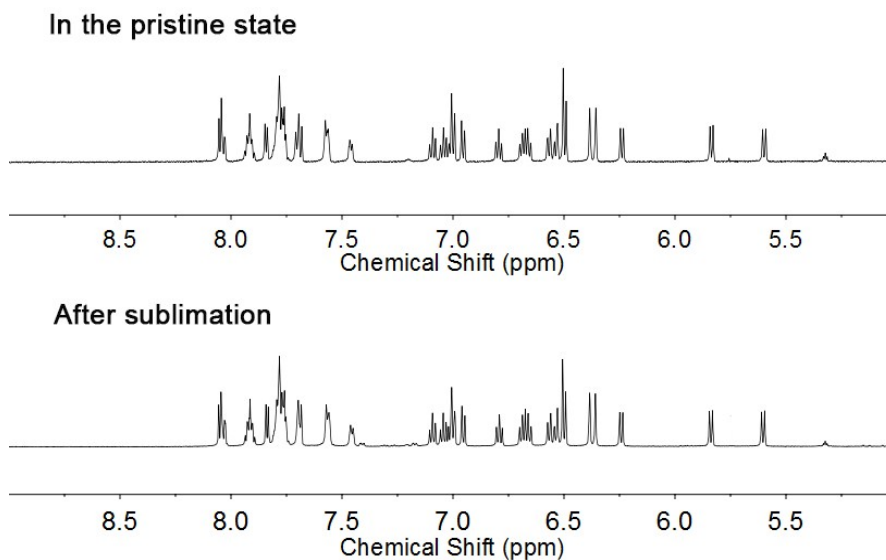

**Fig. S3**  $^1\text{H}$  NMR spectra of  $[(\text{ptbi})_2\text{Ir}(\text{bisq})]\text{Cl}$  in the pristine state and after sublimation.

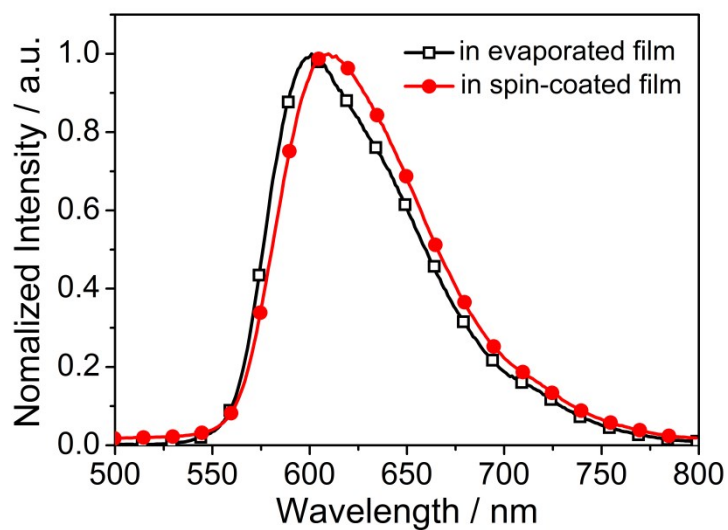

**Fig. S4** PL spectra of  $[(\text{ptbi})_2\text{Ir}(\text{bisq})]\text{Cl}$  in spin-coated and vacuum-evaporated film.

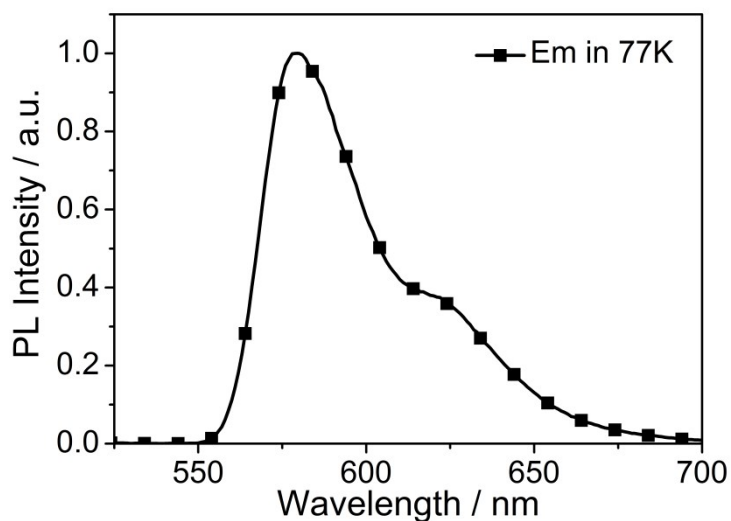

**Fig. S5** PL spectra of  $[(\text{ptbi})_2\text{Ir}(\text{bisq})]\text{Cl}$  in 77 K.

**Table S1.** Photophysical and electrochemical characteristics for  $[(\text{ptbi})_2\text{Ir}(\text{bisq})]\text{Cl}$

| Complex                                            | $\lambda_{\text{PL,max}}^{\text{a),b),c)}$<br>[nm] | $\phi_{\text{p}}^{\text{a),c)}$<br>[%] | $\tau^{\text{a),c)}$<br>[ $\mu\text{s}$ ] | $E_{\text{ox}}^{\text{d)}$<br>[V] | $E_{\text{g}}^{\text{e)}$<br>[eV] | HOMO <sup>f)</sup><br>[eV] | LUMO <sup>g)</sup><br>[eV] | $k_{\text{r}}^{\text{a),c)}$<br>[ $10^5 \text{ s}^{-1}$ ] | $k_{\text{nr}}^{\text{a),c)}$<br>[ $10^5 \text{ s}^{-1}$ ] |
|----------------------------------------------------|----------------------------------------------------|----------------------------------------|-------------------------------------------|-----------------------------------|-----------------------------------|----------------------------|----------------------------|-----------------------------------------------------------|------------------------------------------------------------|
| $[(\text{ptbi})_2\text{Ir}(\text{bisq})]\text{Cl}$ | 608, 580,<br>610                                   | 17.8,<br>32.4                          | 0.67,<br>0.86                             | 0.37                              | 2.34                              | -5.17                      | -2.83                      | 2.66, 3.77                                                | 12.27, 7.86                                                |



a) Measured in acetonitrile ( $10^{-5}$  M) at 298 K. b) 77 K. c) Measured in the neat film. d) Measured by CV with ferrocene as the standard. e) Estimated from the UV-vis absorption spectrum. f) Calculated from onset oxidation potential. g) Deduced from HOMO and Eg

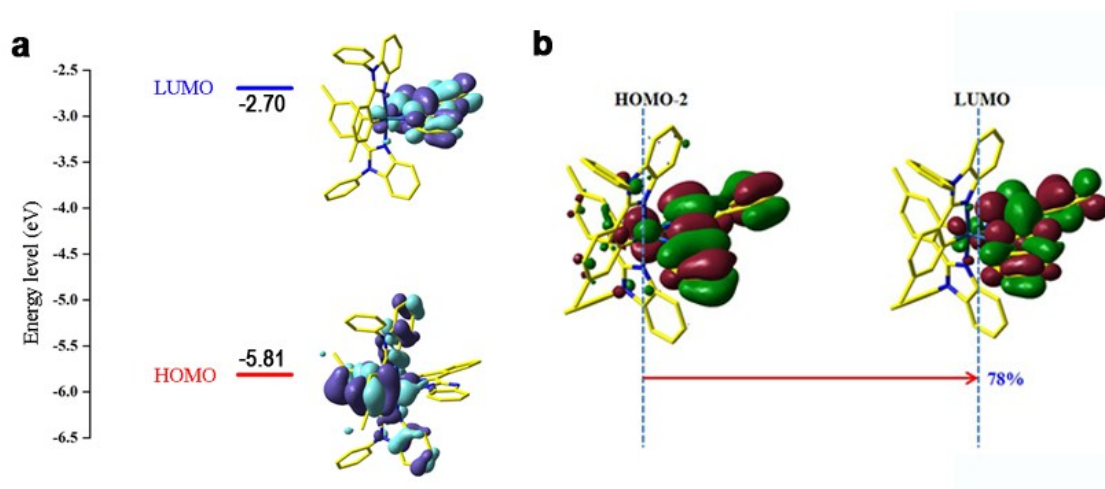

**Fig. S6** (a) Calculated HOMO and LUMO levels and distributions of  $[(\text{ptbi})_2\text{Ir}(\text{bisq})]\text{Cl}$ . All MO surfaces correspond to an isocontour value of  $|\Psi| = 0.02$ . (b) Orbital transition analyses of  $T_1$  state for  $[(\text{ptbi})_2\text{Ir}(\text{bisq})]\text{Cl}$ .

**Table S2.** Calculated triplet excited energy, and transition characteristic of  $T_1$  state for  $[(\text{ptbi})_2\text{Ir}(\text{bisq})]\text{Cl}$

| Complex                                            | State | eV    | Assignment                          | Character                     |
|----------------------------------------------------|-------|-------|-------------------------------------|-------------------------------|
| $[(\text{ptbi})_2\text{Ir}(\text{bisq})]\text{Cl}$ | $T_1$ | 1.929 | HOMO-<br>2 $\rightarrow$ LUMO (78%) | $^3\text{MLCT}/^3\text{LLCT}$ |

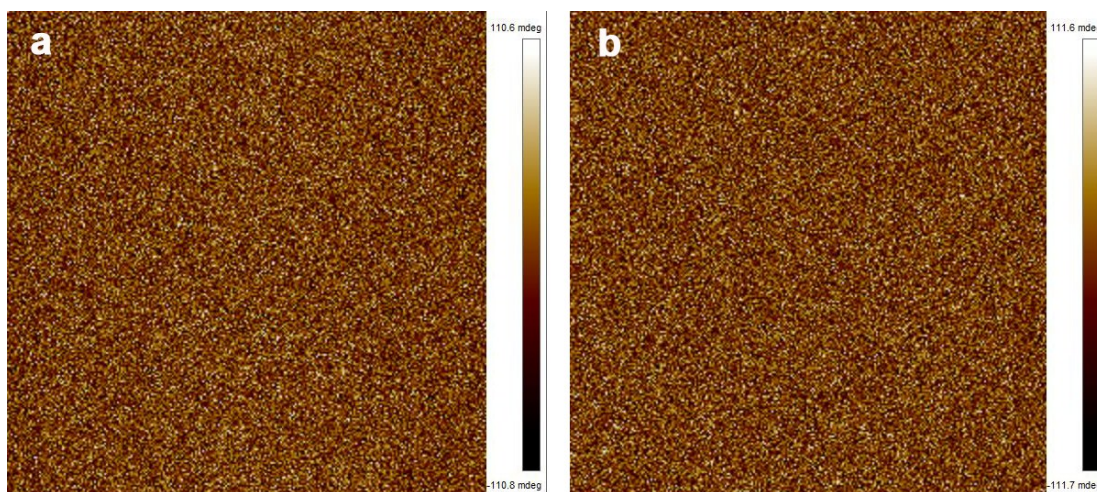

**Fig. S7** AFM images of (a) non-doped evaporated film and (b) doped evaporated film.

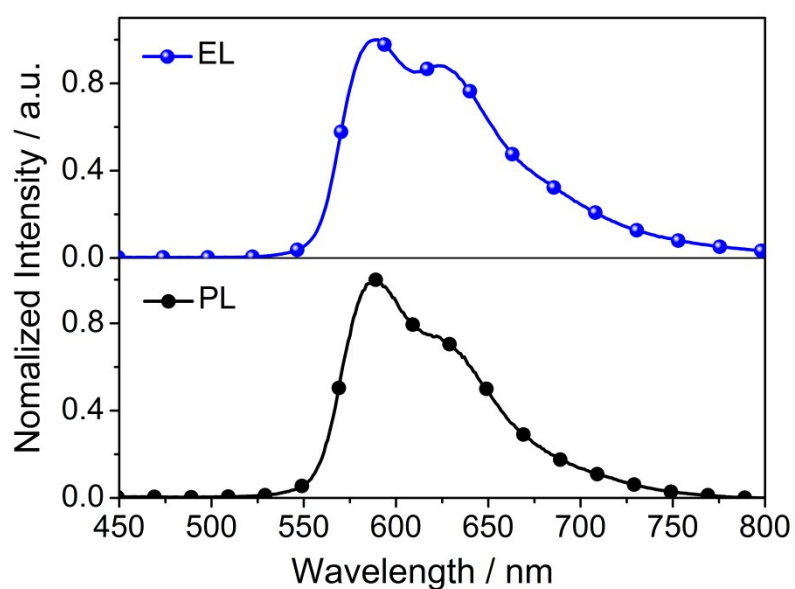

**Fig. S8** PL in the co-evaporated film and EL spectra in doped device.

**Table S3.** Monochromatic OLEDs performance of selected cationic Ir(III) complexes

| complex                                           | host   | $\lambda_{\text{EL}}$<br>[nm] | $V_{\text{turn-on}}$<br>[V] | Max CE<br>[cd A <sup>-1</sup> ] | Max PE<br>[lm W <sup>-1</sup> ] | Max<br>EQE<br>[%] | $L_{\text{max}}^{\text{b}}$<br>[cd m <sup>-2</sup> ] | CIE[(x, y)]  | Ref       |
|---------------------------------------------------|--------|-------------------------------|-----------------------------|---------------------------------|---------------------------------|-------------------|------------------------------------------------------|--------------|-----------|
| [(ptbi) <sub>2</sub> Ir(bisq)]Cl                  | DCZppy | 590, 624                      | 3.3                         | 17.8                            | 15.4                            | 10.5              | 25035                                                | (0.60, 0.40) | This work |
| [Ir(dpfd) <sub>2</sub> (dmbpy)][PF <sub>6</sub> ] | CBP    | 565                           | 5.0                         | 19.7                            | 18.4                            | 6.5               | 15611                                                | (0.44, 0.47) | 3         |
| [Ir(ppy) <sub>2</sub> (ECAF)][PF <sub>6</sub> ]   | CBP    | 540                           | 9.2                         | 20.2                            | 4.9                             | 6.3               | 8588                                                 | (0.38, 0.58) | 4         |

|                                                                         |                   |          |     |      |      |      |        |              |    |
|-------------------------------------------------------------------------|-------------------|----------|-----|------|------|------|--------|--------------|----|
| [Ir(ppy) <sub>2</sub> (EHCAF)][PF <sub>6</sub> ]                        | CBP               | 540      | 8.4 | 23.7 | 5.3  | 6.8  | 11850  | (0.37, 0.58) | 4  |
| [Ir(ppy) <sub>2</sub> (PCAF)][PF <sub>6</sub> ]                         | CBP               | 540      | 8.2 | 21.5 | 5.6  | 6.5  | 10340  | (0.38, 0.58) | 4  |
| [Ir(dfppy) <sub>2</sub> (pzpy)][B(5fph) <sub>4</sub> ]                  | CzPO <sub>2</sub> | 452      | 7.0 | 1.5  | 0.4  | 1.5  | 5700   | (0.18, 0.19) | 5  |
| [Ir(dfppy) <sub>2</sub> (pzpy)][BArF <sub>24</sub> ]                    | CzPO <sub>2</sub> | 452      | 8.7 | 1.2  | 0.4  | 1.2  | 4400   | (0.17, 0.17) | 5  |
| [Ir(ppy) <sub>2</sub> (pyim)][B(5fph) <sub>4</sub> ]                    | DIC-TRZ           | 532      | 4.9 | 15.3 | 8.3  | 5.0  | >27100 | (0.35, 0.57) | 5  |
| [Ir(ppy) <sub>2</sub> (pyim)][BArF <sub>24</sub> ]                      | DIC-TRZ           | 532      | 4.3 | 16.3 | 10.5 | 5.3  | >27100 | (0.36, 0.57) | 5  |
| [Ir(ppy) <sub>2</sub> (bpy)][B(5fph) <sub>4</sub> ]                     | DIC-TRZ           | 550      | 4.4 | 24.3 | 12.9 | 8.1  | >27100 | (0.42, 0.54) | 5  |
| [Ir(ppy) <sub>2</sub> (bpy)][BArF <sub>24</sub> ]                       | DIC-TRZ           | 551      | 3.4 | 22.6 | 15.4 | 7.5  | >27100 | (0.42, 0.54) | 5  |
| [Ir(ppy) <sub>2</sub> (ptop)][B(5fph) <sub>4</sub> ]                    | DIC-TRZ           | 588      | 5.4 | 4.5  | 1.5  | 1.6  | 22100  | (0.51, 0.47) | 5  |
| [Ir(ppy) <sub>2</sub> (ptop)][BArF <sub>24</sub> ]                      | DIC-TRZ           | 588      | 5.6 | 7.1  | 2.8  | 2.5  | 16300  | (0.52, 0.46) | 5  |
| [Ir(ppy) <sub>2</sub> (pop)][B(5fph) <sub>4</sub> ]                     | DIC-TRZ           | 596      | 5.7 | 4.5  | /    | 2.2  | 19400  | (0.52, 0.46) | 6  |
| [Ir(ppy) <sub>2</sub> (pop)][B(5fph) <sub>4</sub> ]                     | TCTA              | 592      | 6.9 | 3.4  | /    | 1.8  | 4400   | (0.52, 0.45) | 6  |
| [Ir(ppy) <sub>2</sub> (pop)][BArF <sub>24</sub> ]                       | DIC-TRZ           | 596      | 5.6 | 5.1  | /    | 2.5  | 11100  | (0.52, 0.46) | 6  |
| [Ir(ppy) <sub>2</sub> (pop)][BArF <sub>24</sub> ]                       | TCTA              | 596      | 5.1 | 2.8  | /    | 1.4  | 4600   | (0.50, 0.44) | 6  |
| [Ir(dFppy) <sub>2</sub> (Phpybi)][B(5FPh) <sub>4</sub> ]                | DIC-TRZ           | 521, 552 | 2.6 | 28.6 | 23.5 | 10.0 | >27300 | (0.41, 0.55) | 7  |
| [Ir(dFppy) <sub>2</sub> (Phpybi)][B(dCF <sub>3</sub> Ph) <sub>4</sub> ] | DIC-TRZ           | 520, 550 | 2.4 | 33.6 | 31.6 | 10.9 | >27300 | (0.39, 0.56) | 7  |
| [Ir(piq) <sub>2</sub> (Phpybi)][B(5FPh) <sub>4</sub> ]                  | DIC-TRZ           | 588, 626 | 2.4 | 17.4 | 14.9 | 11.1 | >27300 | (0.60, 0.40) | 7  |
| [Ir(piq) <sub>2</sub> (Phpybi)][B(dCF <sub>3</sub> Ph) <sub>4</sub> ]   | DIC-TRZ           | 588, 624 | 2.5 | 18.2 | 15.9 | 11.0 | 20500  | (0.59, 0.40) | 7  |
| [Ir(phq) <sub>2</sub> (bpy)][B(5FPh) <sub>4</sub> ]                     | DIC-TRZ           | 556, 591 | 2.2 | 33.1 | 32.2 | 11.1 | >27300 | (0.47, 0.51) | 8  |
| [Ir(phq) <sub>2</sub> (bpy)][B(dCF <sub>3</sub> Ph) <sub>4</sub> ]      | DIC-TRZ           | 560, 589 | 2.5 | 37.0 | 37.5 | 13.7 | >27300 | (0.48, 0.51) | 8  |
| [Ir(piq) <sub>2</sub> (bpy)][B(5FPh) <sub>4</sub> ]                     | DIC-TRZ           | 588, 624 | 2.2 | 16.8 | 18.1 | 10.3 | >27300 | (0.59, 0.40) | 8  |
| [Ir(piq) <sub>2</sub> (bpy)][B(dCF <sub>3</sub> Ph) <sub>4</sub> ]      | DIC-TRZ           | 588, 624 | 2.4 | 16.4 | 14.2 | 9.9  | >27300 | (0.59, 0.40) | 8  |
| [Ir(ppy) <sub>2</sub> (pzpy)][B(5FPh) <sub>4</sub> ]                    | DMAC-DPS          | 510      | 2.6 | 27.9 | 23.4 | 10.5 | 22640  | (0.28, 0.55) | 9  |
| [Ir(ppy) <sub>2</sub> (pzpy)][B(dCF <sub>3</sub> Ph) <sub>4</sub> ]     | DMAC-DPS          | 482, 506 | 3.0 | 24.5 | 21.5 | 9.8  | 11480  | (0.21, 0.44) | 9  |
| [Ir(ppy) <sub>2</sub> (dtb-bpy)][B(5FPh) <sub>4</sub> ]                 | DIC-TRZ           | 556      | 2.3 | 46.5 | 37.9 | 14.8 | >27300 | (0.43, 0.55) | 10 |
| [Ir(ppy) <sub>2</sub> (dtb-bpy)][B(dCF <sub>3</sub> Ph) <sub>4</sub> ]  | DIC-TRZ           | 564      | 2.5 | 40.7 | 31.8 | 13.5 | >27300 | (0.44, 0.53) | 10 |
| [Ir(phq) <sub>2</sub> (dtb-bpy)][B(5FPh) <sub>4</sub> ]                 | DIC-TRZ           | 556, 586 | 2.2 | 40.6 | 40.9 | 13.8 | >27300 | (0.48, 0.51) | 10 |
| [Ir(phq) <sub>2</sub> (dtb-bpy)][B(dCF <sub>3</sub> Ph) <sub>4</sub> ]  | DIC-TRZ           | 558, 586 | 2.3 | 48.9 | 49.0 | 15.8 | >27300 | (0.48, 0.51) | 10 |
| [Ir(piq) <sub>2</sub> (dtb-bpy)][B(5FPh) <sub>4</sub> ]                 | DIC-TRZ           | 588, 626 | 2.4 | 16.5 | 16.6 | 10.7 | >27300 | (0.60, 0.40) | 10 |
| [Ir(piq) <sub>2</sub> (dtb-bpy)][B(dCF <sub>3</sub> Ph) <sub>4</sub> ]  | DIC-TRZ           | 588, 624 | 2.4 | 18.0 | 19.1 | 11.1 | 18800  | (0.59, 0.40) | 10 |

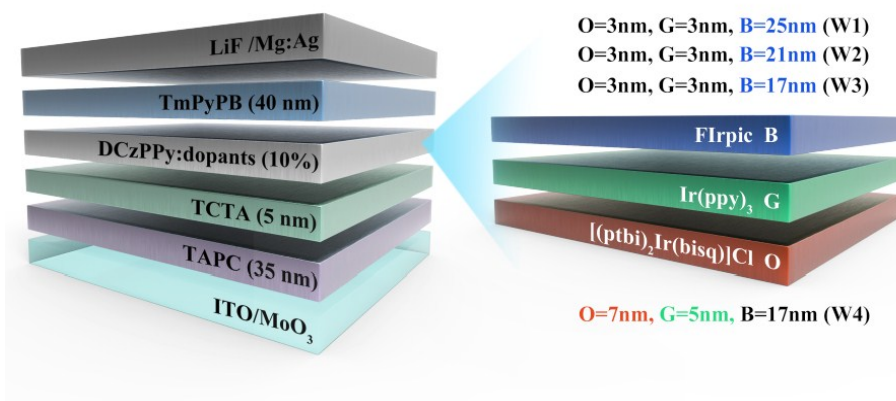

**Fig. S9** Schematic diagram of white OLEDs optimization process

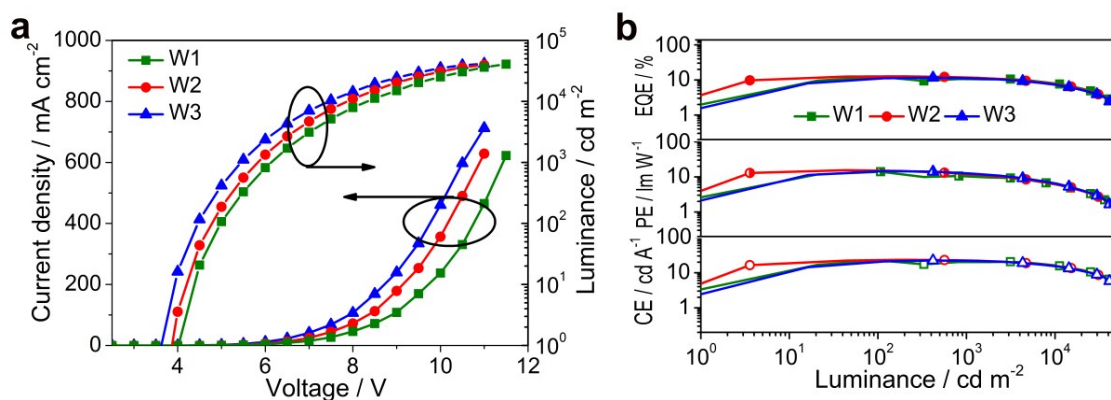

**Fig. S10** (a) Current density-voltage-luminance (b) Current, Power, and external quantum efficiency curves for **W1-W3**.

**Table S4.** Summary of electroluminescence performances for W1-W3

| Device    | $V_{\text{turn-on}}^{\text{a)}$<br>[V] | $\text{CE}^{\text{b), c)}$<br>[ $\text{cd A}^{-1}$ ] | $\text{PE}^{\text{b), c)}$<br>[ $\text{lm W}^{-1}$ ] | $\text{EQE}^{\text{b)}$<br>[%] | Efficiency roll-offs |    |      | $L_{\text{max}}^{\text{b)}$<br>[ $\text{cd m}^{-2}$ ] | $\text{CIE}[(x, y)]$ | CRI |
|-----------|----------------------------------------|------------------------------------------------------|------------------------------------------------------|--------------------------------|----------------------|----|------|-------------------------------------------------------|----------------------|-----|
|           |                                        |                                                      |                                                      |                                | CE                   | PE | EQE  |                                                       |                      |     |
| <b>W1</b> | 4.0                                    | 22.4/20.2                                            | 14.1/10.4                                            | 12.3/10.6                      | 9.8                  | 26 | 13.6 | 40786                                                 | (0.48,0.42)          | 80  |
| <b>W2</b> | 3.6                                    | 23.4/22.7                                            | 15.6/12.2                                            | 12.5/11.8                      | 3.0                  | 22 | 6.0  | 39712                                                 | (0.48,0.42)          | 80  |
| <b>W3</b> | 3.5                                    | 22.5/21.9                                            | 14.6/12.7                                            | 11.6/11.2                      | 2.7                  | 13 | 3.6  | 41358                                                 | (0.48,0.42)          | 80  |

<sup>a)</sup> Defined as the bias at a brightness of  $1 \text{ cd m}^{-2}$ . <sup>b)</sup> Maximum values of the devices. <sup>c)</sup>

Values of the devices at  $1000 \text{ cd m}^{-2}$

**Table S5.** WOLEDs performance of selected cationic iridium(III) complexes

| Device    | $V_{\text{turn-on}}$<br>[V] | Max CE<br>[cd A <sup>-1</sup> ] | Max PE<br>[lm W <sup>-1</sup> ] | Max EQE<br>[%] | $L_{\text{max}}$<br>[cd m <sup>-2</sup> ] | CIE[(x, y)] | CRI | Ref       |
|-----------|-----------------------------|---------------------------------|---------------------------------|----------------|-------------------------------------------|-------------|-----|-----------|
| <b>1</b>  | 5.4                         | 1.8                             | /                               | 0.9            | 3700                                      | (0.33,0.34) | 86  | 4         |
| <b>2</b>  | 6.0                         | 0.5                             | /                               | 0.4            | 1900                                      | (0.32,0.27) | 89  | 4         |
| <b>W1</b> | 4.0                         | 22.4                            | 14.1                            | 12.3           | 40786                                     | (0.48,0.42) | 80  | This work |
| <b>W2</b> | 3.6                         | 23.4                            | 15.6                            | 12.5           | 39712                                     | (0.48,0.42) | 80  | This work |
| <b>W3</b> | 3.5                         | 22.5                            | 14.6                            | 11.6           | 41358                                     | (0.48,0.43) | 80  | This work |
| <b>W4</b> | 3.6                         | 25.5                            | 17.3                            | 13.1           | 50122                                     | (0.49,0.45) | 80  | This work |

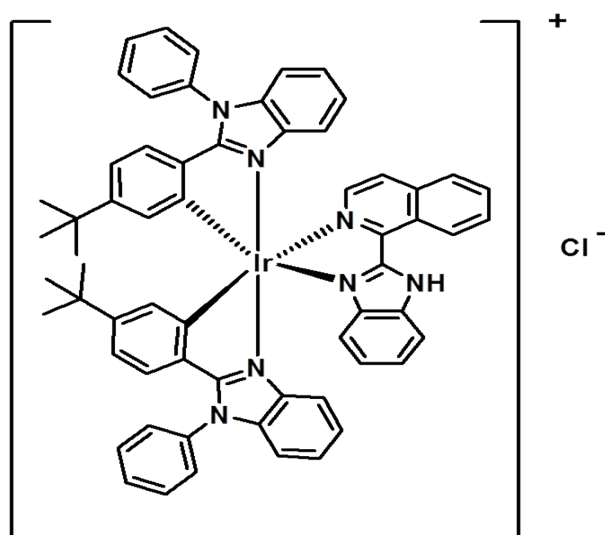

**Fig. S11** Chemical structure of [(tbpbi)<sub>2</sub>Ir(bisq)]Cl.

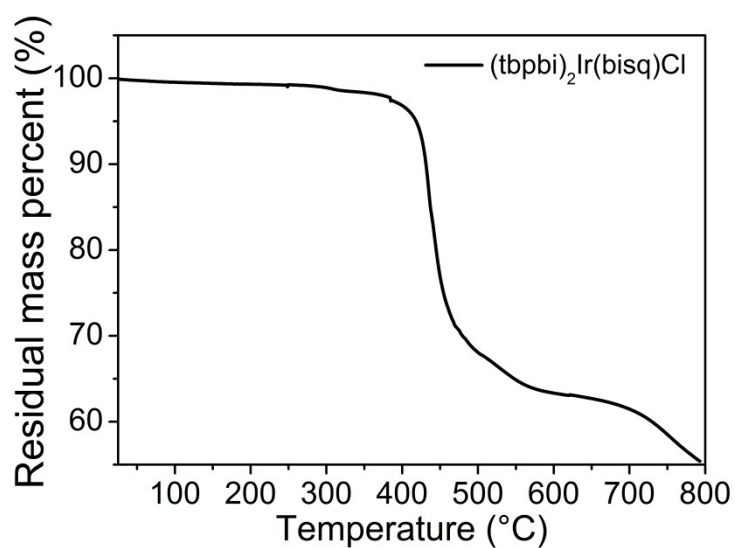

**Fig. S12** Thermal gravimetric analysis (TGA) curves of  $[(\text{tbpbi})_2\text{Ir}(\text{bisq})]\text{Cl}$  under a dry nitrogen gas flow at a heating rate of  $10^\circ\text{C min}^{-1}$ .

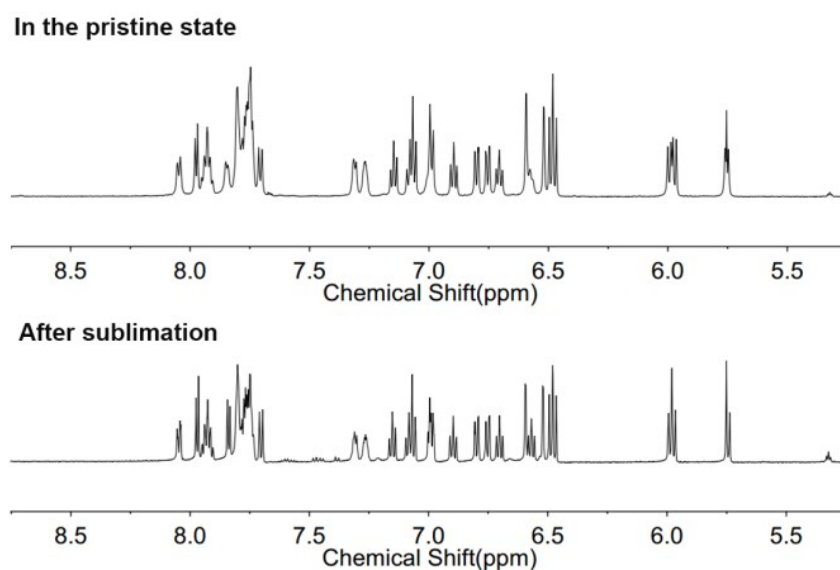

**Fig. S13**  $^1\text{H}$  NMR spectra of  $[(\text{tbpbi})_2\text{Ir}(\text{bisq})]\text{Cl}$  in the pristine state and after sublimation.

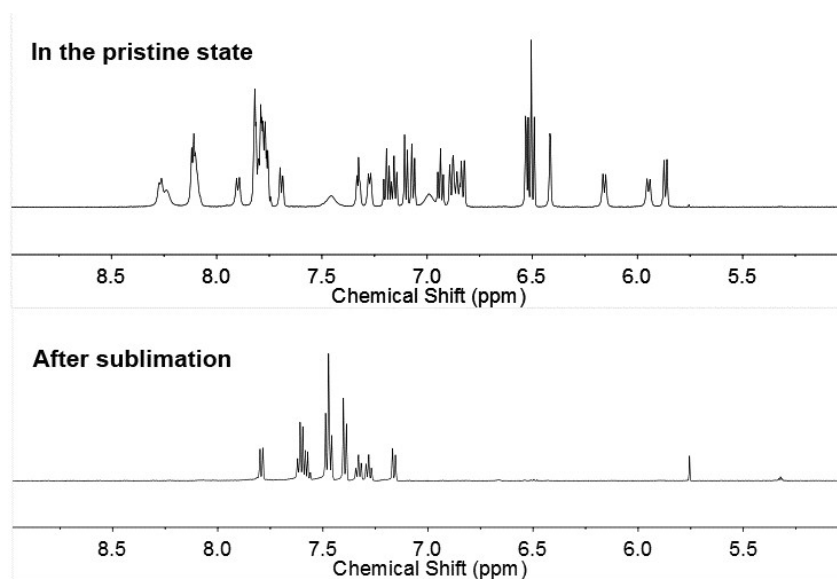

**Fig. S14**  $^1\text{H}$  NMR spectra of  $[(\text{tbpbil})_2\text{Ir}(\text{bisq})]\text{PF}_6$  in the pristine state and after sublimation.

## References

1. T.-R. Chen, *Mater. Lett.*, 2005, **59**, 1050.
2. Frisch, M. J.; Trucks, G. W.; Schlegel, H. B.; Scuseria, G. E.; Robb, M. A.; Cheeseman, J. R.; Scalmani, G.; Barone, V.; Mennucci, B.; Petersson, G. A.; Nakatsuji, H.; Caricato, M.; Li, X.; Hratchian, H. P.; Izmaylov, A. F.; Bloino, J.; Zheng, G.; Sonnenberg, J. L.; Hada, M.; Ehara, M.; Toyota, K.; Fukuda, R.; Hasegawa, J.; Ishida, M.; Nakajima, T.; Honda, Y.; Kitao, O.; Nakai, H.; Vreven, T.; Montgomery, J. A., Jr.; Peralta, J. E.; Ogliaro, F.; Bearpark, M.; Heyd, J. J.; Brothers, E.; Kudin, K. N.; Staroverov, V. N.; Kobayashi, R.; Normand, J.; Raghavachari, K.; Rendell, A.; Burant, J. C.; Iyengar, S. S.; Tomasi, J.; Cossi, M.; Rega, N.; Millam, J. M.; Klene, M.; Knox, J. E.; Cross, J. B.; Bakken, V.; Adamo, C.; Jaramillo, J.; Gomperts, R.; Stratmann, R. E.; Yazyev, O.; Austin, A. J.; Cammi, R.; Pomelli, C.; Ochterski, J. W.; Martin, R. L.; Morokuma, K.; Zakrzewski, V. G.; Voth, G. A.; Salvador, P.; Dannenberg,

- J. J.; Dapprich, S.; Daniels, A. D.; Farkas, Ö .; Foresman, J. B.; Ortiz, J. V.; Cioslowski, J.; Fox, D. J. Gaussian 09, Revision D.01; Gaussian, Inc.: Wallingford, CT, 2013.
3. W. Y. Wong, G. J. Zhou, X. M. Yu, H. S. Kwok and Z. Lin, *Adv. Funct. Mater.*, 2007, **17**, 315.
  4. F. Zhang, Y. Guan, S. Wang, S. Li, F. Zhang, Y. Feng, S. Chen, G. Cao and B. Zhai, *Dyes Pigments*, 2016, **130**, 1.
  5. D. Ma, Y. Qiu and L. Duan, *Adv. Funct. Mater.*, 2016, **26**, 3438.
  6. D. Ma, L. Duan and Y. Qiu, *J. Mater. Chem. C*, 2016, **4**, 5051.
  7. D. Ma, C. Zhang, R. Liu, Y. Qiu and L. Duan, *Chem.Eur.J.*, 2018, **24**, 5574.
  8. D. Ma, R. Liu, Y. Qiu and L. Duan, *J. Mater. Chem. C*, 2018, **6**, 5630.
  9. D. Ma, Y. Qiu and L. Duan, *ChemPlusChem*, 2018, **83**, 211.
  10. D. Ma, R. Liu, C. Zhang, Y. Qiu, L. Duan, *ACS Photonics* **2018**, DOI: 10.1021/acsp Photonics.8b00716.
